# Supplementary material for: Stand Structure Management and Tree Diversity Conservation Based on Using Stand Factors: A Case Study in the Longwan National Nature Reserve
Source: MDPI journal article supplement (doi:10.3390/f14040750), 2023-04-06
Supplement: s1 [file s1]

| Arbor species                                                            | Sample plots |       |       |       |       |       |      |      |      |      |       |       |      |       |       |       |       |       |       |       |       |       |       |       |       |  |
|--------------------------------------------------------------------------|--------------|-------|-------|-------|-------|-------|------|------|------|------|-------|-------|------|-------|-------|-------|-------|-------|-------|-------|-------|-------|-------|-------|-------|--|
|                                                                          | A            | B     | C     | D     | E     | F     | G    | H    | I    | J    | K     | L     | M    | N     | O     | P     | Q     | R     | S     | T     | U     | V     | W     | X     | Y     |  |
| <i>Acer mandshuricum</i>                                                 | 8.67         | 5.99  | 3.18  | 9.72  |       |       | 0.58 | 4.97 |      |      | 6.77  | 15.95 |      | 35.77 | 3.88  |       |       | 16.80 |       | 6.71  | 0.28  | 28.65 |       |       |       |  |
| <i>Syringa reticulata</i> subsp. <i>Amurensis</i><br>(Rupr.) P. S. Green | 0.32         |       |       | 10.08 |       |       |      | 0.40 |      |      |       |       | 0.25 |       |       |       | 0.56  |       | 0.53  | 1.58  |       |       | 1.09  |       |       |  |
| <i>Padus racemosa</i> (Linn.) Gilib.                                     | 7.82         |       |       | 0.50  |       |       |      | 1.23 |      | 0.91 |       |       |      |       |       |       | 0.23  |       | 2.29  | 1.72  |       |       | 4.21  | 0.99  |       |  |
| <i>Ulmus japonica</i>                                                    | 16.5         | 6.15  | 1.92  | 5.25  | 10.18 | 6.63  | 3.43 | 18.2 | 7.08 | 7.77 | 10.22 | 23.31 | 26.2 |       | 25.82 | 19.89 | 42.28 | 0.52  | 21.65 |       | 2.17  | 7.15  | 20.23 | 9.76  | 13.26 |  |
| <i>Juglans mandshurica</i>                                               | 46.7         | 27.66 | 23.47 | 36.41 |       |       | 3.94 | 8.79 | 15.0 | 24.0 | 1.24  | 2.15  | 29.4 | 16.76 | 7.92  | 29.34 | 23.74 | 44.99 | 0.39  | 26.13 | 22.95 | 20.43 | 5.65  | 5.63  | 36.76 |  |
| <i>Phellodendron amurense</i> Rupr.                                      | 9.14         | 3.32  | 6.49  | 2.12  | 5.17  |       | 4.57 | 3.22 |      | 3.20 | 1.13  |       | 1.13 |       | 5.29  | 4.37  | 1.03  |       | 4.62  | 15.59 | 2.84  | 2.68  |       |       | 0.49  |  |
| <i>Ulmus laciniata</i> (Trautv.) Mayr.                                   | 2.30         | 7.82  | 11.11 | 12.59 |       |       | 0.47 | 4.12 |      |      | 1.02  |       | 5.39 | 25.38 |       |       | 1.52  | 6.82  |       | 12.32 |       | 11.84 | 2.00  |       | 0.77  |  |
| <i>Acer triflorum</i> Komarov                                            | 1.29         | 1.87  | 0.28  | 0.43  | 2.84  | 0.86  |      |      |      | 2.18 | 10.05 | 14.23 | 15.9 |       | 7.51  | 0.85  |       |       | 5.65  |       | 10.31 |       | 1.04  | 7.74  | 1.92  |  |
| <i>Acer mono</i>                                                         | 7.23         | 27.39 | 4.00  | 15.03 | 14.10 | 16.82 | 23.6 | 10.8 | 6.95 | 25.1 | 14.65 | 4.72  | 9.53 | 11.52 | 5.45  | 1.34  | 2.33  | 28.82 | 4.11  | 6.73  | 9.08  | 9.31  | 27.06 | 5.22  | 8.21  |  |
| <i>Pinus koraiensis</i> Sieb. et Zucc.                                   |              | 5.65  | 4.16  | 2.18  | 2.52  | 5.77  |      |      |      |      | 2.51  |       |      |       |       | 0.92  |       |       |       |       |       |       |       |       | 4.14  |  |
| <i>Quercus mongolica</i>                                                 |              | 2.20  | 3.08  |       | 8.38  | 13.86 | 15.9 | 2.54 | 8.89 | 3.91 | 6.50  | 1.13  |      | 1.39  | 1.65  |       |       |       | 2.58  |       | 5.48  |       |       | 22.10 | 17.65 |  |
| <i>Acer ukurunduense</i> Trautv. et Mey.                                 |              |       |       |       |       | 0.25  |      | 0.51 |      |      |       |       |      |       |       |       |       |       |       | 0.27  |       |       |       |       |       |  |
| <i>Fraxinus mandschurica</i>                                             |              | 11.97 |       | 2.97  |       |       |      | 16.1 |      | 14.8 | 4.64  | 11.56 | 10.8 |       | 25.27 | 2.29  |       | 1.31  | 30.25 | 5.16  | 0.66  | 1.27  | 30.21 | 9.57  | 8.36  |  |
| <i>Abies nephrolepis</i> (Trautv.) Maxim.                                |              |       | 0.63  |       |       |       |      |      |      |      |       |       |      |       |       | 0.86  |       |       |       | 0.87  |       | 1.53  |       |       |       |  |
| <i>Betula costata</i> Trautv                                             |              |       | 2.62  |       |       | 1.04  |      |      |      |      | 0.90  |       |      | 1.04  |       |       |       |       | 0.30  |       |       |       |       |       |       |  |
| <i>Tilia mandschurica</i>                                                |              |       | 14.15 |       |       |       |      |      | 3.03 |      |       |       |      |       |       |       |       |       | 2.23  | 14.37 | 23.61 |       |       |       |       |  |
| <i>Abies holophylla</i> Maxim.                                           |              |       | 2.23  |       | 0.24  |       |      |      |      |      |       |       |      |       |       |       |       |       |       |       |       |       |       |       |       |  |
| <i>Acer truncatum</i> Bunge                                              |              |       | 0.89  |       |       | 0.63  | 3.51 |      |      |      |       |       |      |       |       |       |       |       | 3.25  |       |       | 1.83  | 2.58  |       |       |  |
| <i>Tilia amurensis</i>                                                   |              |       | 21.80 | 1.45  | 12.57 | 29.10 | 6.74 | 0.95 | 2.18 |      | 20.53 | 24.85 | 1.27 | 6.49  |       | 4.90  | 8.44  | 0.74  | 3.79  | 4.39  | 22.31 | 3.98  | 2.63  | 7.38  |       |  |
| <i>Rhamnus diamantiaca</i> Nakai                                         |              |       |       | 0.77  |       |       |      |      |      |      |       |       |      |       |       |       | 1.75  |       |       |       |       |       |       |       |       |  |
| <i>Acer tegmentosum</i> Maxim                                            |              |       |       | 0.52  |       |       | 1.29 |      |      |      |       |       |      |       |       |       |       |       |       | 2.97  |       |       |       |       |       |  |
| <i>Betula platyphylla</i>                                                |              |       |       |       | 22.60 | 16.58 |      | 4.93 | 11.2 |      | 18.28 |       |      |       |       |       |       |       |       |       |       |       |       |       |       |  |
